# Supplementary material for: Association of Chromosome 9p21 With Subsequent Coronary Heart Disease Events: A GENIUS-CHD Study of Individual Participant Data
Source: PubMed Central journal article supplement (PMC6625876; doi:10.1161/circgen.119.002471), 2019-04-16
Supplement: NIHMS1021636-supplement-Supplement_1.pdf [file NIHMS1021636-supplement-Supplement_1.pdf]

## **SUPPLEMENTAL MATERIAL**

# 1 Supplemental Methods

## Data sources

The GENIUS-CHD consortium is an international collaboration of prospective cohort studies selectively including individuals with established coronary heart disease at baseline and following them for future subsequent CHD events, with cases defined as those experiencing a subsequent event and controls as those who do not.<sup>1 2</sup> Full details on the individual studies have been published previously, with study-specific references provided in Table 1 (main paper).

The primary criteria for inclusion in the consortium are studies that recruited individuals with: (1) established CHD, defined as a history of or presence at baseline of acute coronary syndrome, or of coronary artery disease as evidenced by any revascularization procedure such as percutaneous coronary intervention or coronary bypass surgery, or a significant (50%) coronary artery plaque at angiography affecting any major epicardial vessel, (2) availability of prospective follow-up and ascertainment of at least one clinical cardiovascular outcome including all-cause mortality, and (3) availability of samples and/or biomarkers or in-silico genotyping data. Full details about the GENIUS-CHD Consortium have been published elsewhere.<sup>1</sup>

The CARDIOGRAMPlusC4D Consortium is a global collaboration that, in contrast to GENIUS-CHD, includes only case-control studies, where cases are defined as having any CHD and controls are individuals free of CHD. The publicly-available dataset consists of individuals predominantly of European descent, with imputed genome-wide data covering 6.7million common variants and 2.7million low-frequency variants. Full details of this resource have been published elsewhere.<sup>3</sup>

The UK Biobank recruited 500,000 participants aged 40-69 from England, Scotland and Wales between 2006 and 2010, with comprehensive baseline data and prospective follow up recorded. We used these data for sensitivity analyses to look for any evidence of selection bias. At the time of our

analyses genetic data were available for 408,480 participants. Full details of this resource have been published elsewhere.<sup>4</sup>

## **Genetic variant selection**

We selected the genetic variant rs1333049 as the most established marker for CHD risk at the 9p21 locus. Genotype data were subjected to local quality controls by each study prior to analysis. Given the palindromic nature of rs1333049 (G/C), and the potential for erroneous coding, all studies were asked to confirm the SNP was reported on the forward (upper/+) DNA strand. Studies were also asked to run association analysis according to the established risk allele (C), not the minor allele given the risk allele frequency fluctuates around 0.5. At the meta-analysis level, these risk allele frequencies were again examined to ensure that they were broadly representative across studies, see Supplementary Figure 1. Genotyping details (including SNP and linkage disequilibrium with the lead variant) for each cohort in GENIUS-CHD are provided in Supplementary Table 1.

## **Outcomes**

The primary outcome of interest was a composite of CHD death or myocardial infarction, whichever came first (CHD death/MI) during follow-up. Secondary outcomes of interest during follow-up included: MI, coronary revascularization, heart failure, ischemic stroke, any stroke, any cardiovascular disease (CVD, including MI, stroke, revascularization, and CVD death), CHD death, CVD death, and all-cause death.

## **Statistical analysis**

Individual studies participating within the GENIUS-CHD Consortium evaluated the association between chromosome 9p21 variants and subsequent events assuming an additive genetic model and using both binary logistic regression and time-to-event Cox proportional-hazards models. All analyses were adjusted for age and sex. Across the consortium, analyses were performed using

shared statistical scripts and harmonized datasets, as described in the accompanying design paper.<sup>1</sup>

For the purposes of comparison with CARDIOGRAMplusC4D, which reported odds ratios (OR), we present logistic regression results as our primary analysis, although time-to-event results are also provided and can be found in the supplementary materials.

For both GENIUS-CHD and CARDIOGRAMplusC4D, study-level effect estimates and their corresponding standard errors were then meta-analysed using an inverse variance weighted fixed-effects model. Heterogeneity was quantified using the  $\chi^2$  test for heterogeneity and the  $I^2$  statistic.

To assess consistency, the chromosome 9p21 association with the primary outcome was stratified on patient-level characteristics measured at baseline, including: age (< or  $\geq$  65years), sex, hypertension (physician diagnosed or treated), type 2 diabetes (T2DM, physician diagnosed or treated), body mass index (BMI 18.5-24.9; 25-29.9;  $\geq$ 30kg/m<sup>2</sup>), statin use, anti-platelet use, renal impairment (eGFR <60ml/kg/min), and left-ventricular impairment (LVEF<45% or diagnosed heart failure with impaired systolic function). The meta-analysis was also stratified on study-specific factors including: sample size (< or  $\geq$  1000 participants), geographical location (by continent), study design, and follow-up years (< or  $\geq$  5 years). Differences between estimates were evaluated using interaction tests.<sup>5, 6</sup> Finally, to explore the impact of time period of recruitment, stratification by enrollment date was not possible due to the variable duration, and dynamic ongoing enrollment in many participating studies. As such, study specific results were ordered by enrollment start date to assess for crude differences over time.

To assess the potential for index event bias in our data,<sup>7</sup> (whereby associations between the exposure of interest and risk factors for the disease may be induced by conditioning on subjects with CHD), we examined for any differences in associations between chromosome 9p21 and common cardiovascular risk factors in individuals from the general population and those with established CHD. For this purpose we utilized the UK Biobank (UKB) which has available genetic and risk factor data for both groups of individuals. Risk factors tested included age, smoking behaviour, T2DM, BMI, and systolic blood pressure (SBP). Biomarkers were unavailable at the time of analysis. Differences between risk

factor associations in each group (general population and those with CHD) were tested using interaction effects. We also explored potential for survival bias by looking for differences in chromosome 9p21 risk allele frequencies in survivors with CHD compared to the general population in the UKB cohort and then by 5-year age categories in each group.

To reduce the potential for population stratification bias, we excluded individuals that self-identified as non-European. Effect sizes and confidence intervals (CI) were calculated using a two-sided alpha of 0.05, and results are presented as mean difference, ORs, or hazard ratios (HR). All analyses were conducted using R software (R Development Core Team).<sup>8</sup>

## 2. Supplemental Tables

**Table 1:** Genotyping details for each cohort

| Alias            | SNP used   | R <sup>2</sup> with lead SNP | Risk allele | Risk allele frequency | HWE   | Genotyping Platform                                                                                                        |
|------------------|------------|------------------------------|-------------|-----------------------|-------|----------------------------------------------------------------------------------------------------------------------------|
| 4C               | rs1333049  |                              | C           | 0.505                 | 0.919 | Custom                                                                                                                     |
| AGNES            | rs4977574  | 0.878                        | G           | 0.485                 | 0.136 | Illumina Human610k-Quad v1 array                                                                                           |
| ANGES            | rs1333049  |                              | C           | 0.484                 | 0.871 | MetaboChip                                                                                                                 |
| ATVB             | rs1333049  |                              | C           | 0.585                 | 1.000 | Affymetrix 6.0 GeneChip                                                                                                    |
| CABGenomics      | rs1333049  |                              | C           | 0.560                 | 0.757 | Sequenom                                                                                                                   |
| CDCS             | rs1333049  |                              | C           | 0.513                 | 0.451 | Sequenom and Taqman assays                                                                                                 |
| COROGENE         | rs1333049  |                              | C           | 0.466                 | 0.603 | Illumina Human610k-Quad                                                                                                    |
| CTMM             | rs1333049  |                              | C           | 0.537                 | 0.326 | Affymetrix Axiom tx                                                                                                        |
| CURE             | rs10757278 | 0.968                        | G           | 0.527                 | 0.176 | Taqman assay                                                                                                               |
| EGCUT            | rs1333049  |                              | C           | 0.479                 | 0.094 | Illumina OmniExpress, Illumina Global Screening array                                                                      |
| EMORY            | rs1333049  |                              | C           | 0.503                 | 0.515 | Multiplex or taqman                                                                                                        |
| ERICO            | rs1333049  |                              | C           | 0.487                 | 1.000 | Affymetrix axion                                                                                                           |
| FINCAVAS         | rs1333049  |                              | C           | 0.453                 | 0.657 | MetaboChip, n = 2278, CoreExome, n = 926                                                                                   |
| FRISCI           | rs1333049  |                              | C           | 0.485                 | 0.747 |                                                                                                                            |
| GENDEMIP         | rs1333049  |                              | C           | 0.526                 | 0.574 | Taqman assay                                                                                                               |
| GENEBANK         | rs1333049  |                              | C           | 0.544                 | 0.647 | Affymetrix 6.0 GeneChip                                                                                                    |
| GENESIS-PRAXY    | rs4977574  | 0.878                        | G           | 0.555                 | 1.000 | Sequenom: Platform: iPLEX® Gold Genotyping Technology Taqman: Platform: TaqMan® Genotyping Technology (Applied Biosystems) |
| GENOCOR          | rs1333049  |                              | C           | 0.560                 | 1.000 | High resolution melting curve analysis-LC Green and a Light Scanner (Idaho Tech)                                           |
| GoDARTSincident  | rs1333049  |                              | C           | 0.511                 | 0.231 | Affy; Affy1KG; Illumina; Illumina 1KG; broad                                                                               |
| GoDARTSprevalent | rs1333049  |                              | C           | 0.507                 | 0.227 | Affy; Affy1KG; Illumina; Illumina 1KG; broad                                                                               |
| GRACE            | rs1333049  |                              | C           | 0.516                 | 0.150 | Sequenom (734 samples)                                                                                                     |
| GRACE_UK         | rs1333049  |                              | C           | 0.518                 | 0.466 | Sequenom                                                                                                                   |

|               |            |       |   |       |       |                                                                                                           |
|---------------|------------|-------|---|-------|-------|-----------------------------------------------------------------------------------------------------------|
| IDEAL         | rs1333049  |       | C | 0.501 | 0.704 | Sequenom MassArray Maldi-TOF System                                                                       |
| INTERMOUNTAIN | rs1333049  |       | C | 0.520 | 0.144 | Applied Biosciences Inc                                                                                   |
| INVEST        | rs10757278 | 0.968 | G | 0.498 | 0.931 | Taqman; Illumina IBC; Illumina OmniExpress                                                                |
| JUMC          | rs1333049  |       | C | 0.509 | 0.707 | TaqMan? Real-Time PCR Assays (7900HT Fast Real Time System or OpenArray NT cycler)                        |
| KAROLA        | rs1333049  |       | C | 0.524 | 0.813 | restriction fragment length polymorphism (RFLP)                                                           |
| LIFE-Heart    | rs1333049  |       | C | 0.506 | 0.855 | Affymetrix Axiom CADLIFE (CEU+custom content) or Affymetrix Axiom CEU                                     |
| LURIC         | rs1333049  |       | C | 0.533 | 0.005 | Affymetrix 6.0                                                                                            |
| NE_POLAND     | rs1333049  |       | C | 0.522 | 0.087 | ABI 7500 real time PCR                                                                                    |
| NEAPOLIS      | rs1333049  |       | C | 0.542 | 0.001 | GENOTYPING 7900HT Fast Real-Time PCR System                                                               |
| OHGS          | rs1333049  |       | C | 0.527 | 0.129 | Affymetrix Axiom                                                                                          |
| PLATO         | rs1333049  |       | C | 0.518 | 0.731 | Illumina HumanOmni2.5-4v1 BeadChip, Illumina Infinium HumanOmniExpressExome-8 v1                          |
| PMI           | rs1333049  |       | C | 0.521 | 0.032 | Sequenom and Taqman assays                                                                                |
| POPular       | rs1333049  |       | C | 0.505 | 0.145 |                                                                                                           |
| PROSPER       | rs1333049  |       | C | 0.556 | 0.290 | Illumina 660K quad beadchip                                                                               |
| RISCA         | rs4977574  | 0.878 | G | 0.563 | 0.316 | iPLEX technology on a MassARRAY Compact Analyser                                                          |
| SHEEP         | rs1333049  |       | C | 0.482 | 0.723 | Illumina Cardiometabochip                                                                                 |
| SMART         | rs10757278 | 0.968 | G | 0.515 | 0.460 | TaqMan assay                                                                                              |
| STABILITY     | rs1333049  |       | C | 0.534 | 0.723 | Illumina HumanOmniExpressExome-8 v1 BeadChip                                                              |
| THI           | rs1333049  |       | C | 0.531 | 0.673 | Sequenom massarray system, TaqMan                                                                         |
| TNT           | rs1333049  |       | C | 0.524 | 0.844 | Sequenom massarray Maldi-tof System                                                                       |
| TRIUMPH       | rs1333049  |       | C | 0.522 | 0.191 | Infinium HumanCore BeadChip array (GWAS) and the Illumina HumanExome v1.1 Analysis BeadChip array (Exome) |
| UCORBIO       | rs1333049  |       | C | 0.513 | 0.541 | TaqMan assay                                                                                              |
| UCP           | rs1333049  |       | C | 0.501 | 0.504 | 50K Illumina CArE iSelect (IBC)                                                                           |
| VHS           | rs1333049  |       | C | 0.586 | 0.274 | iPLEX MassARRAY platform, Multilocus genotyping assay by Roche                                            |
| VIVIT         | rs1333049  |       | C | 0.533 | 0.699 | CardioMetaboChip                                                                                          |
| WARSAW ACS    | rs10757278 | 0.968 | G | 0.496 | 0.165 | TaqMan Assay; ABI 7500 real time PCR platform                                                             |
| WTCCC         | rs1333049  |       | C | 0.554 | 0.712 | Affymetrix GeneChip© Human Mapping 500K Array Set                                                         |

**Table 2:** Power of the rs1333049 SNP association with CHD death or MI

| <b>OR</b> | <b>Power</b> |
|-----------|--------------|
| 1.02      | 0.40         |
| 1.03      | 0.66         |
| 1.04      | 0.86         |
| 1.05      | 0.96         |
| 1.10      | 1.00         |
| 1.20      | 1.00         |

*N.b.* based on an alpha of 0.10 (two sided 0.05)



**Table 3:** Subsequent events available in each study for association with 9p21.

| Alias            | CHD Death or MI | Myocardial Infarction | Revasc | Ischemic Stroke | Any Stroke | Heart Failure | All CVD | CHD Death | CVD Death | All Cause Death | Mean Follow-up (SD), years |
|------------------|-----------------|-----------------------|--------|-----------------|------------|---------------|---------|-----------|-----------|-----------------|----------------------------|
| 4C               | 22              | NA                    | NA     | NA              | NA         | NA            | 63      | 22        | 25        | 63              | 2.38 (0.75)                |
| AGNES            | 155             | 124                   | 232    | NA              | 38         | 82            | 334     | 38        | 38        | 180             | 7.10 (4.74)                |
| ANGES            | 173             | 86                    | 207    | 60              | 66         | 124           | 310     | 128       | 89        | 178             | 8.20 (4.40)                |
| ATVB             | 235             | 229                   | 544    | NA              | 22         | NA            | 338     | 40        | 30        | 81              | 10.42 (4.48)               |
| CABGenomics      | NA              | NA                    | NA     | NA              | NA         | 156           | NA      | NA        | NA        | 393             | NA                         |
| CDCS             | 532             | 522                   | 495    | 116             | 146        | 337           | 863     | 196       | 242       | 433             | 5.20 (2.14)                |
| COROGENE         | NA              | NA                    | NA     | NA              | NA         | NA            | NA      | NA        | NA        | 359             | NA                         |
| CTMM             | 12              | 10                    | 70     | NA              | NA         | NA            | 75      | 2         | NA        | 4               | 0.97 (0.36)                |
| CURE             | 362             | 257                   | 146    | NA              | 50         | 106           | 449     | 176       | 78        | 246             | 0.78 (0.28)                |
| EGCUT            | 640             | 455                   | 230    | 301             | 326        | 1468          | 1097    | 284       | 580       | 825             | 6.56 (2.90)                |
| EMORY            | 386             | 132                   | 735    | NA              | 65         | 196           | 1017    | 328       | 359       | 595             | 5.83 (3.14)                |
| ERICO            | 88              | 63                    | NA     | NA              | NA         | NA            | 111     | 70        | 70        | 111             | 2.88 (1.47)                |
| FINCAVAS         | 447             | 309                   | 399    | 191             | 214        | 336           | 730     | 247       | 185       | 440             | 8.57 (3.99)                |
| FRISCI           | 666             | 510                   | 1679   | NA              | NA         | NA            | 1914    | 266       | 251       | 362             | 7.46 (2.09)                |
| GENDEMIP         | NA              | NA                    | NA     | NA              | NA         | NA            | NA      | NA        | 93        | 155             | 1.12 (0.78)                |
| GENEBANK         | 116             | 116                   | 857    | NA              | 30         | NA            | 997     | NA        | NA        | 153             | 3.00 (0.00)                |
| GENESIS-PRAXY    | 36              | 28                    | 53     | NA              | 1          | 3             | 72      | NA        | 29        | 8               | 1.00 (0.00)                |
| GENOCOR          | 35              | 32                    | 80     | NA              | 12         | 3             | 141     | 24        | 26        | 57              | 5.68 (1.20)                |
| GoDARTSincident  | 159             | 128                   | 157    | 32              | 70         | 93            | 553     | 85        | 115       | 286             | 3.64 (2.99)                |
| GoDARTSprevalent | 416             | 329                   | 172    | 82              | 173        | 251           | 1225    | 260       | 322       | 750             | 6.78 (2.93)                |
| GRACE            | 47              | 47                    | NA     | NA              | NA         | NA            | NA      | NA        | 2         | NA              | 4.25 (1.79)                |
| GRACE_UK         | 269             | 184                   | 319    | NA              | 54         | 194           | 990     | 164       | NA        | 230             | 10.62 (2.15)               |
| IDEAL            | 464             | 398                   | 948    | 7               | 179        | 136           | 1307    | 89        | 119       | 203             | 4.80 (0.41)                |

|               |      |      |      |     |     |     |      |      |      |      |              |
|---------------|------|------|------|-----|-----|-----|------|------|------|------|--------------|
| INTERMOUNTAIN | 2749 | 1664 | 2009 | NA  | 494 | 650 | 3667 | 1609 | 1643 | 2317 | 8.56 (5.39)  |
| INVEST        | 63   | 63   | NA   | NA  | 49  | NA  | 166  | NA   | 21   | 76   | 3.08 (0.81)  |
| JUMC          | 89   | 75   | 47   | 14  | 14  | 20  | 130  | 28   | 30   | 81   | 0.85 (0.33)  |
| KAROLA        | 185  | 135  | NA   | NA  | 77  | NA  | 268  | 104  | 139  | 255  | 11.67 (2.94) |
| LIFE-Heart    | 58   | NA   | NA   | NA  | NA  | NA  | 62   | 58   | 62   | 391  | 1.76 (2.19)  |
| LURIC         | 471  | 146  | NA   | NA  | 42  | NA  | 471  | 413  | 457  | 736  | 8.65 (3.14)  |
| NE_POLAND     | NA   | NA   | NA   | NA  | NA  | NA  | NA   | NA   | NA   | 189  | 7.20 (2.75)  |
| NEAPOLIS      | 27   | 24   | 14   | 5   | 5   | 12  | 201  | 13   | 13   | 45   | 1.07 (0.55)  |
| OHGS          | 24   | 15   | 117  | NA  | NA  | NA  | 137  | 13   | 17   | 18   | 1.77 (0.29)  |
| PLATO         | 793  | 567  | 2140 | 89  | 110 | 423 | 2686 | 300  | 326  | 369  | 0.86 (0.24)  |
| PMI           | 313  | 313  | 338  | 67  | 85  | 157 | 532  | 186  | 221  | 374  | 8.66 (3.32)  |
| POPular       | 66   | 58   | 49   | 12  | 12  | NA  | 116  | 8    | 8    | 16   | 1.00 (0.00)  |
| PROSPER       | 86   | 86   | 11   | NA  | 29  | 32  | 125  | 37   | 46   | 69   | 3.14 (0.68)  |
| RISCA         | 139  | 128  | 584  | NA  | 6   | 30  | 619  | 25   | 27   | 34   | 1.22 (0.18)  |
| SHEEP         | 483  | 483  | 5    | 158 | 188 | 284 | 702  | 155  | 178  | 595  | 14.87 (5.91) |
| SMART         | 257  | 163  | 868  | NA  | 58  | NA  | NA   | 118  | NA   | 259  | 7.57 (3.51)  |
| STABILITY     | 730  | 450  | 1038 | 162 | 181 | 212 | 1582 | 351  | 387  | 621  | 3.60 (0.57)  |
| THI           | 309  | 309  | 570  | NA  | 86  | 398 | 1234 | NA   | NA   | 632  | 5.49 (3.43)  |
| TNT           | 347  | 279  | 825  | NA  | 130 | 144 | 1098 | 97   | 118  | 251  | 4.57 (1.19)  |
| TRIUMPH       | NA   | NA   | NA   | NA  | NA  | NA  | NA   | NA   | NA   | 97   | 0.97 (0.15)  |
| UCORBIO       | 59   | 59   | 101  | NA  | 9   | 24  | 155  | NA   | 17   | 36   | NA           |
| UCP           | 229  | 229  | 547  | 27  | 53  | 90  | NA   | NA   | NA   | NA   | 8.01 (4.16)  |
| VHS           | 132  | 24   | NA   | NA  | NA  | NA  | NA   | 109  | 126  | 182  | 5.62 (2.99)  |
| VIVIT         | 171  | 126  | 237  | NA  | 80  | NA  | 436  | 99   | 131  | 290  | 7.58 (2.78)  |
| WARSAW ACS    | NA   | NA   | NA   | NA  | NA  | NA  | NA   | NA   | NA   | 106  | 2.96 (1.17)  |
| WTCCC         | NA   | NA   | NA   | NA  | NA  | NA  | NA   | NA   | NA   | 411  | 10.05 (2.81) |

CHD = Coronary Heart Disease; CVD = Cardiovascular

**Table 4:** Risk factor distribution by Ch9p21 genotype in the whole UKB population (n = 408,480) and the subset with CHD (n=15,275).

| N                                  | UKB General Population (N=408,480) |        |        |                      | UKB CHD Population (N=15,275) |        |        |                      | Difference in Association |          |
|------------------------------------|------------------------------------|--------|--------|----------------------|-------------------------------|--------|--------|----------------------|---------------------------|----------|
|                                    | CC                                 | GC     | GG     | MD or OR (95%CI)     | CC                            | GC     | GG     | MD or OR (95%CI)     | OR Interaction            | P value  |
| rs1333049 genotype                 |                                    |        |        |                      |                               |        |        |                      |                           |          |
| Age, yrs                           | 56.85                              | 56.92  | 56.97  | -0.06 (-0.09, -0.03) | 62.01                         | 62.3   | 62.34  | -0.17 (-0.30, -0.04) | 0.11 (-0.02, 0.25)        | 0.105025 |
| Ever Smoked, %                     | 45.04%                             | 45.27% | 45.39% | 0.99 (0.98, 1.00)    | 65.30%                        | 67.00% | 65.50% | 0.99 (0.94, 1.04)    | 1.00 (0.95,1.05)          | 0.926777 |
| Type 2 Diabetes, %                 | 5.00%                              | 4.85%  | 4.68%  | 1.04 (1.02, 1.06)    | 17.67%                        | 17.97% | 16.86% | 1.03 (0.97,1.09)     | 1.00 (0.95-1.07)          | 0.81107  |
| Body Mass Index, kg/m <sup>2</sup> | 27.18                              | 27.21  | 27.21  | -0.02 (-0.04, 0.01)  | 28.83                         | 29.03  | 29.04  | -0.15 (-0.26, -0.04) | 0.13 (0.02, 0.24)         | 0.020743 |
| Systolic Blood Pressure, mmHg      | 139.9                              | 139.8  | 139.8  | 0.06 (-0.03, 0.15)   | 139.7                         | 140.1  | 140.1  | -0.16 (-0.63, 0.30)  | 0.23 (-0.25, 0.70)        | 0.349446 |

CHD defined as prior MI or revascularization. Mean difference (MD), odds ratio (OR), 95% confidence interval (95%CI), difference were calculated either on the identity scale or on the natural logarithm of the OR.

### 3 Supplemental Figures

Figure 1

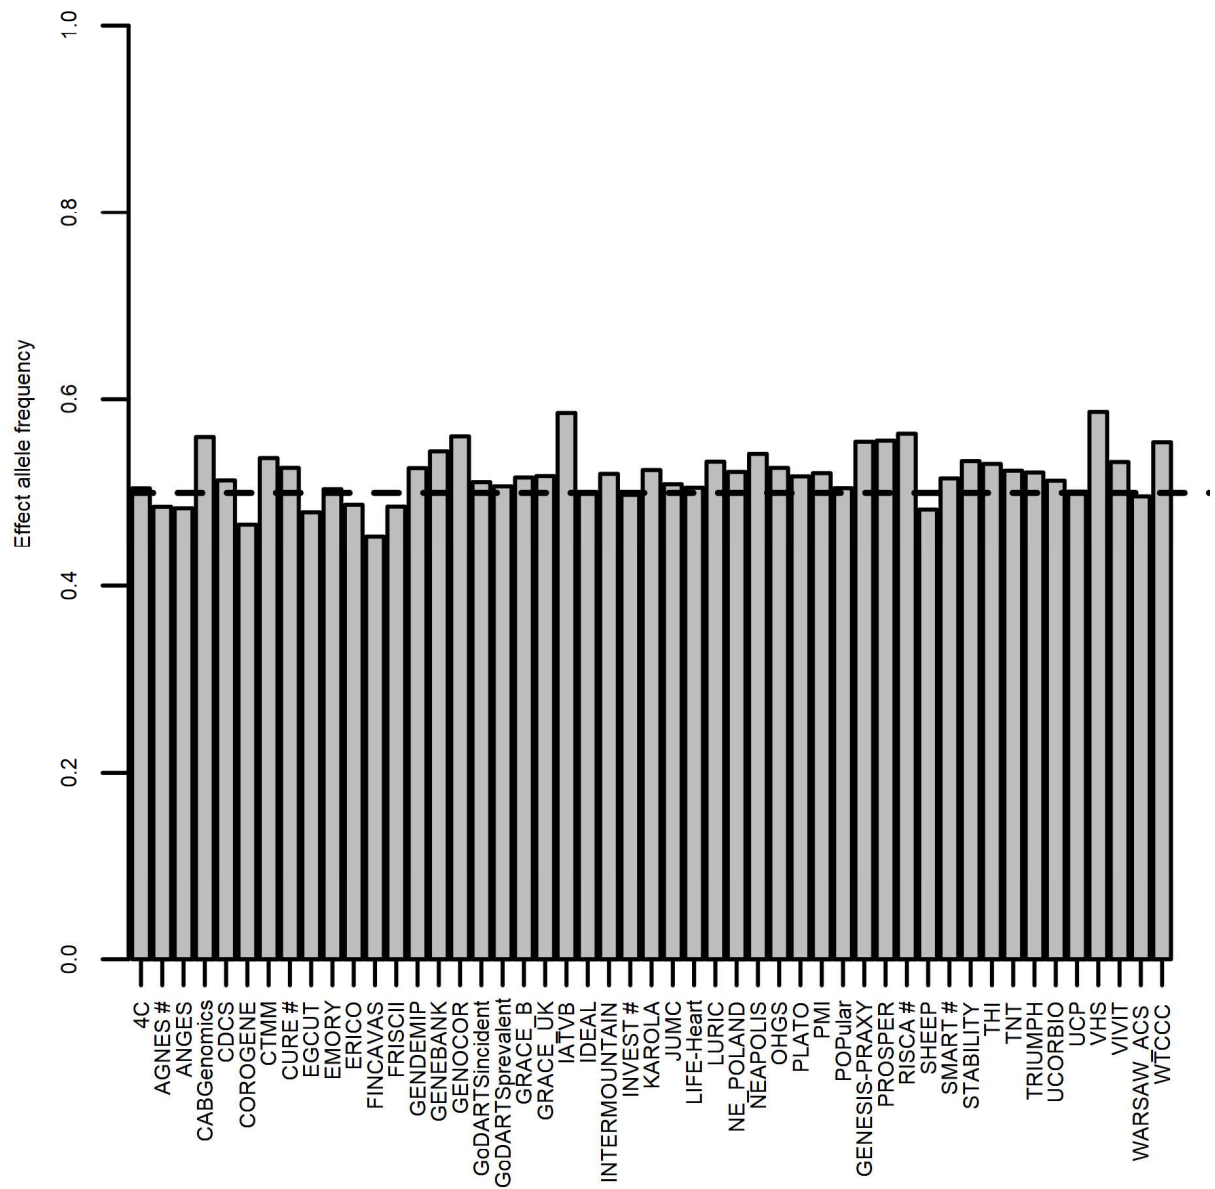

Figure 1: Study specific effect allele frequency of the GENIUS 9p21 rs1333049 variant; # indicates proxy variants rs4977574 or rs10757278. Dashed line indicates 0.50.

**Figure 2**

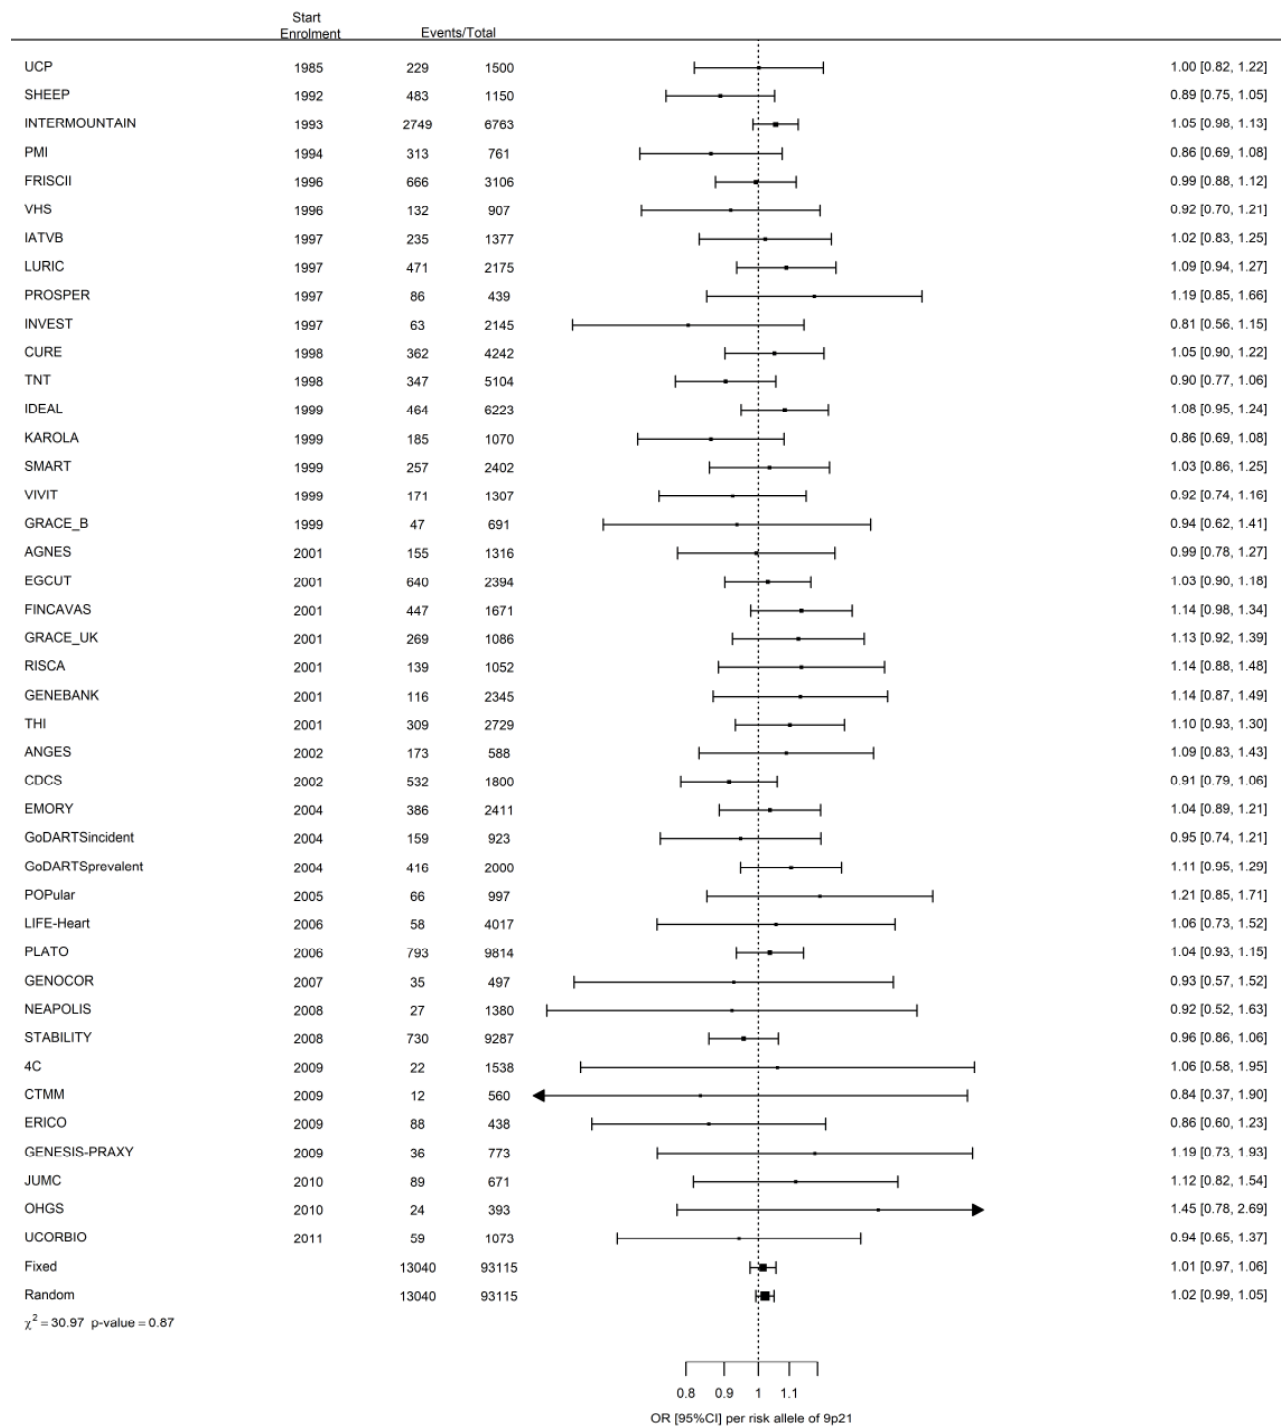

Figure 2: The study specific 9p21 associations of rs1333049 with CHD death/MI in subjects with established CHD. Estimates reflect the effect of a change in risk allele, and were adjusted for age and sex using study specific logistic regression models. Studies were ordered by start of enrollment date

**Figure 3**

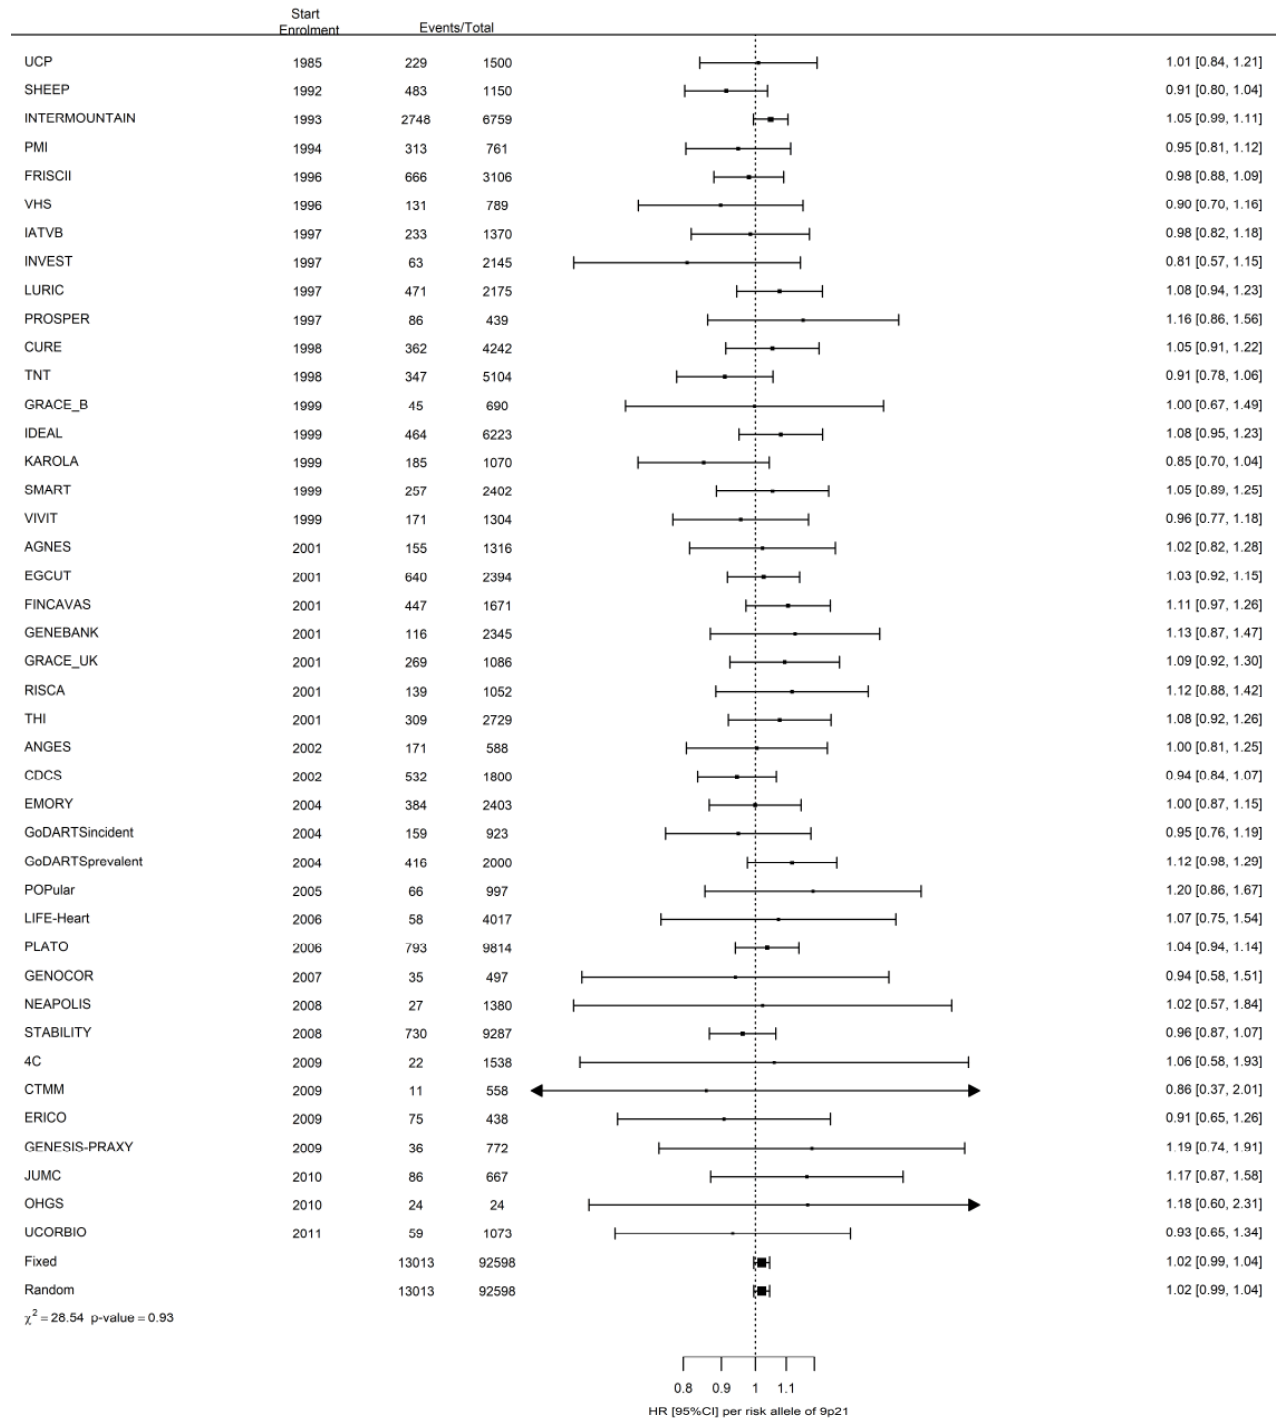

Figure 3: The study specific 9p21 associations of rs1333049 with subsequent CHD death/MI in subjects with established CHD. Estimates reflect the effect of a change in risk allele, and were adjusted for age and sex using study specific Cox proportional hazard models. Studies were ordered by start of enrollment date.

**Figure 4**

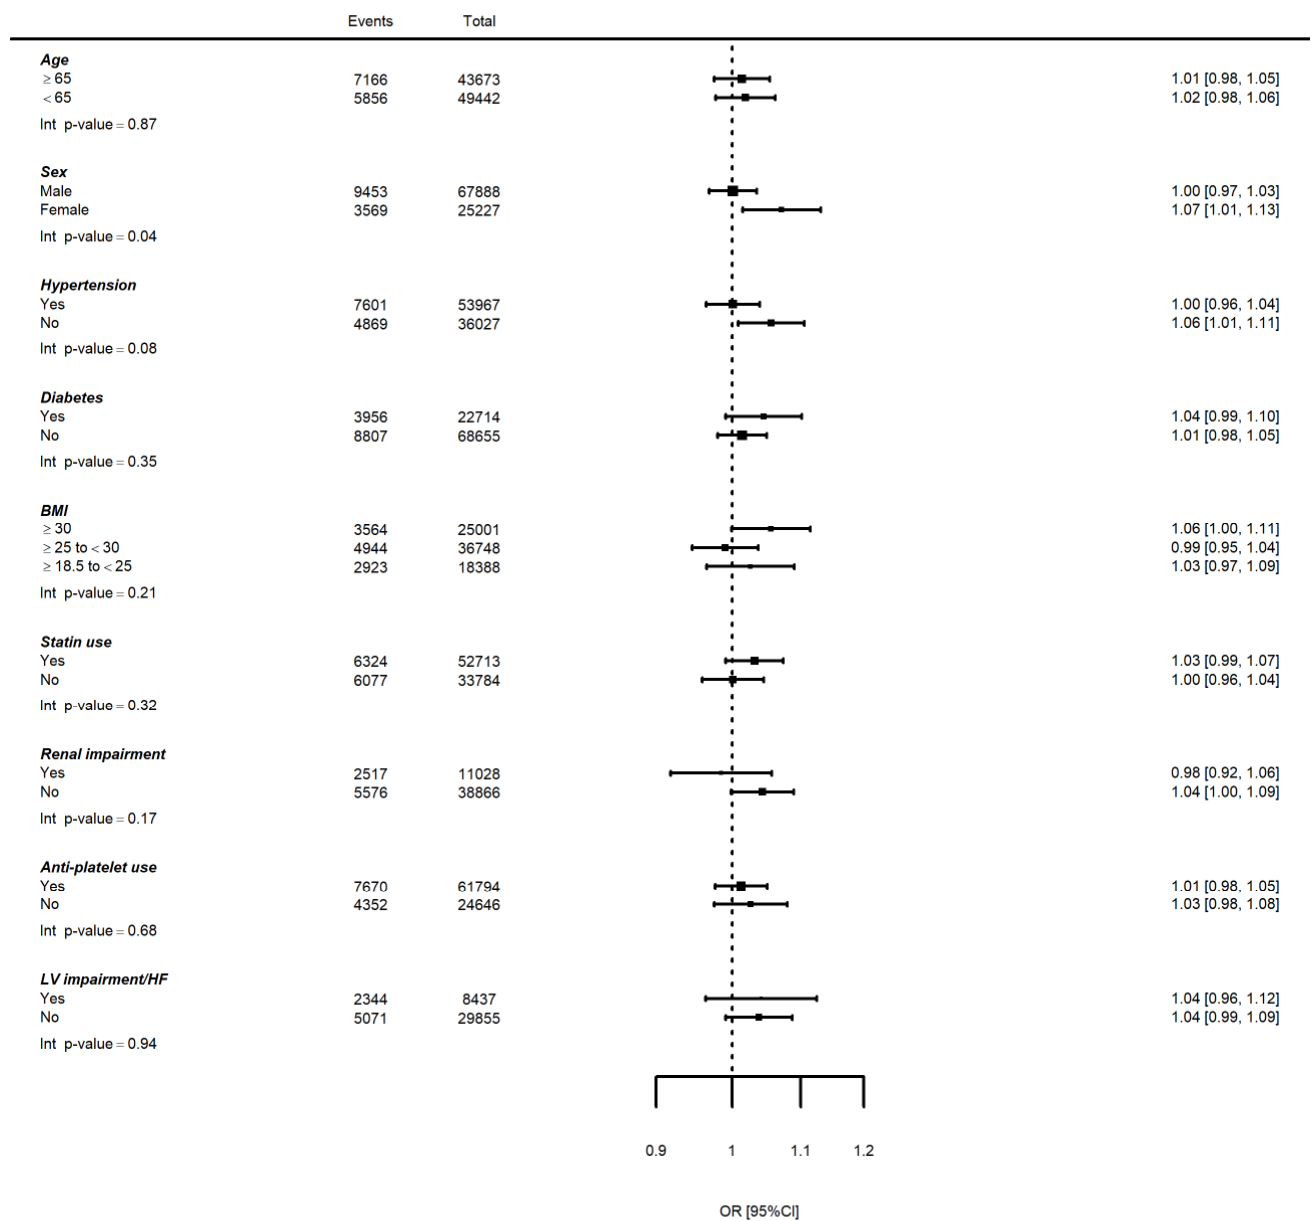

Figure 4: Subgroup effects of 9p21 on CHD death/MI among subjects with established CHD.

**Figure 5**

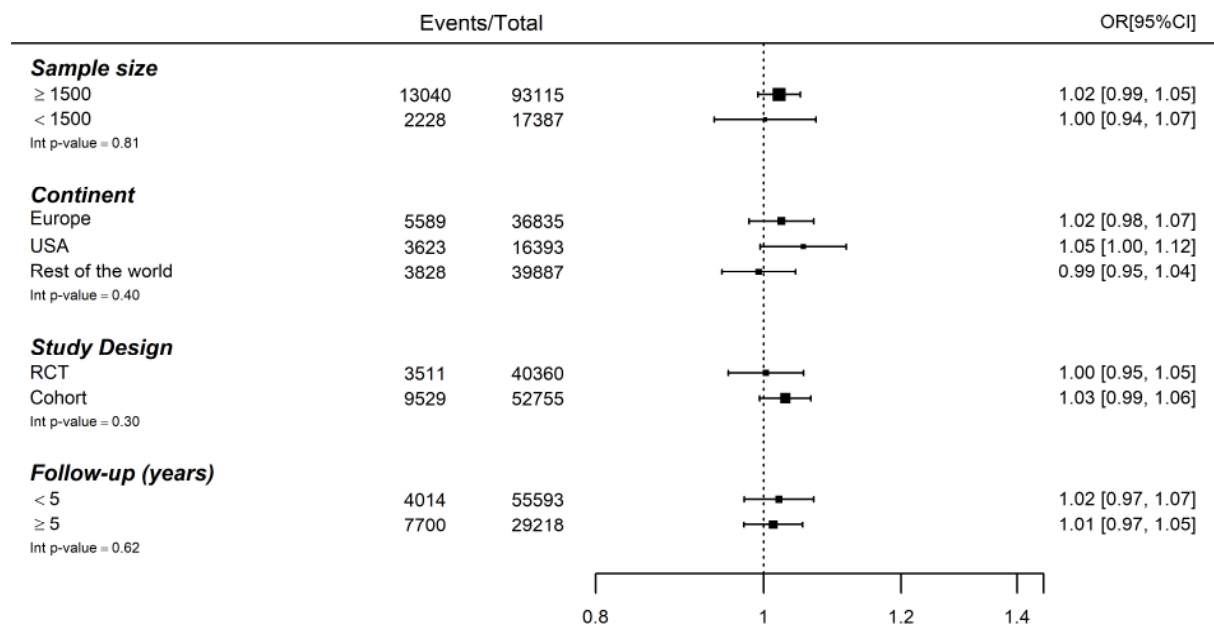

Figure 5: Study specific subgroup effects of 9p21 on CHD death/MI among subjects with established CHD.



Figure 6

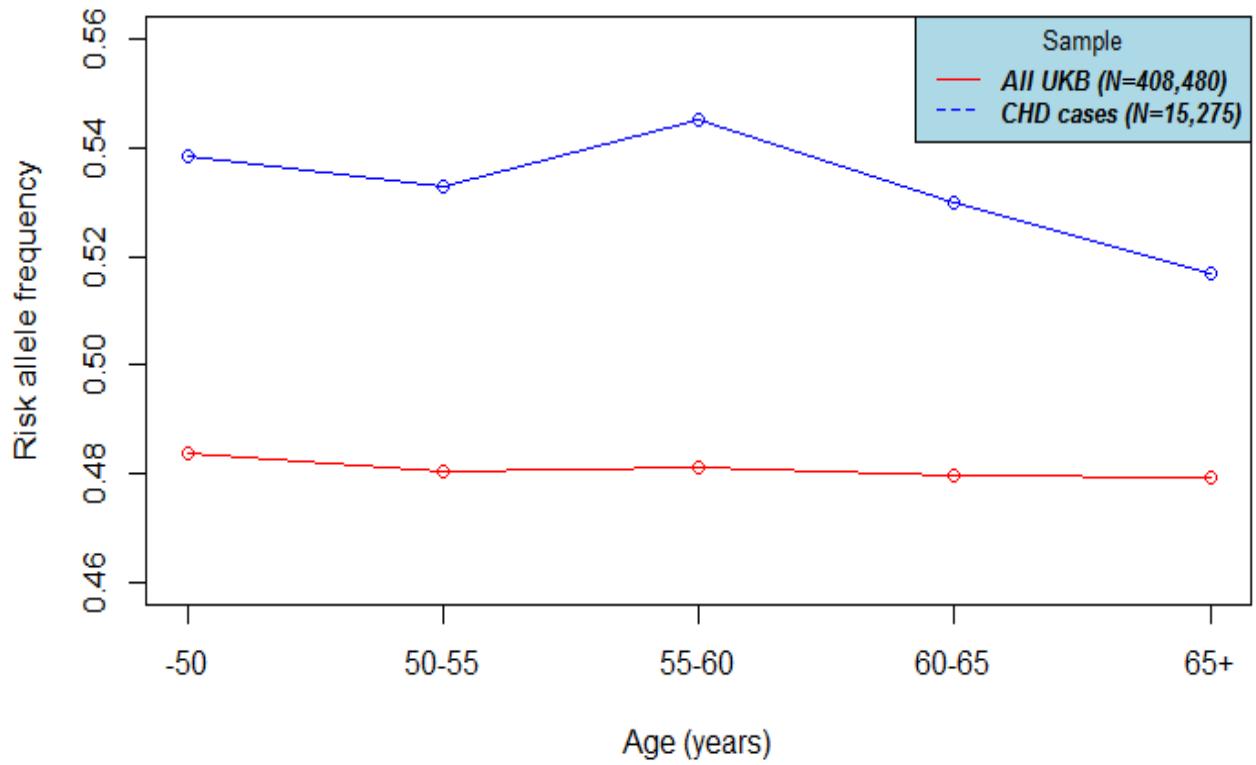

Figure 6: Risk allele frequencies by age in the UK Biobank. Risk allele frequencies by 5 year age groups, among the full UKB general population and the subset with established CHD. Risk allele for rs1333049 is C.

## 4 Supplemental References

1. Patel RS, et al. Subsequent Event Risk in Individuals with Established Coronary Heart Disease: Design and Rationale of the GENIUS-CHD Consortium *Circ Genom Precis Med.* 2019;12.
2. Patel RS, et al. The GENIUS-CHD consortium. *Eur Heart J.* 2015;36:2674-6.
3. Nikpay M, et al. A comprehensive 1,000 Genomes-based genome-wide association meta-analysis of coronary artery disease. *Nat Genet.* 2015;47:1121-1130.
4. Littlejohns TJ, et al. UK Biobank: opportunities for cardiovascular research. *Eur Heart J.* 2017.
5. Rothwell PM, et al. Treating individuals 3: from subgroups to individuals: general principles and the example of carotid endarterectomy. *Lancet.* 2005;365:256-65.
6. Sun X, et al. Is a subgroup effect believable? Updating criteria to evaluate the credibility of subgroup analyses. *BMJ.* 2010;340:c117.
7. Dahabreh IJ, et al. Index event bias as an explanation for the paradoxes of recurrence risk research. *JAMA.* 2011;305:822-3.
8. R: A language and environment for statistical computing [computer program]. Vienna, Austria: R Foundation for Statistical Computing;; 2018.

## 5 Additional Information

### List of CARDIoGRAMplusC4D authors

Panos Deloukas<sup>1,126</sup>, Stavroula Kanoni<sup>1,126</sup>, Christina Willenborg<sup>2,126</sup>, Martin Farrall<sup>3,4,126</sup>, Themistocles L Assimes<sup>5,126</sup>, John R Thompson<sup>6,126</sup>, Erik Ingelsson<sup>7,126</sup>, Danish Saleheen<sup>8–10,126</sup>, Jeanette Erdmann<sup>2,126</sup>, Benjamin A Goldstein<sup>5</sup>, Kathleen Stirrups<sup>1</sup>, Inke R König<sup>11</sup>, Jean-Baptiste Cazier<sup>4</sup>, Åsa Johansson<sup>12</sup>, Alistair S Hall<sup>13</sup>, Jong-Young Lee<sup>14</sup>, Cristen J Willer<sup>15,16</sup>, John C Chambers<sup>17</sup>, Tõnu Esko<sup>18,19</sup>, Lasse Folkersen<sup>20,21</sup>, Anuj Goel<sup>3,4</sup>, Elin Grundberg<sup>22</sup>, Aki S Havulinna<sup>23</sup>, Weang K Ho<sup>10</sup>, Jemma C Hopewell<sup>24,25</sup>, Niclas Eriksson<sup>12</sup>, Marcus E Kleber<sup>26,27</sup>, Kati Kristiansson<sup>23</sup>, Per Lundmark<sup>28</sup>, Leo-Pekka Lyytikäinen<sup>29,30</sup>, Suzanne Rafelt<sup>31</sup>, Dmitry Shungin<sup>32–34</sup>, Rona J Strawbridge<sup>20,21</sup>, Gudmar Thorleifsson<sup>35</sup>, Emmi Tikkanen<sup>36,37</sup>, Natalie Van Zuydam<sup>38</sup>, Benjamin F Voight<sup>39</sup>, Lindsay L Waite<sup>40</sup>, Weihua Zhang<sup>17</sup>, Andreas Ziegler<sup>11</sup>, Devin Absher<sup>40</sup>, David Altshuler<sup>41–44</sup>, Anthony J Balmforth<sup>45</sup>, Inês Barroso<sup>1,46</sup>, Peter S Braund<sup>31,47</sup>, Christof Burgdorf<sup>48</sup>, , Simone Claudi-Boehm<sup>49</sup>, David Cox<sup>50</sup>, Maria Dimitriou<sup>51</sup>, Ron Do<sup>41,43</sup>, CARDIOGENICS Consortium<sup>52</sup>, DIAGRAM Consortium<sup>52</sup>, Alex S F Doney<sup>38</sup>, NourEddine El Mokhtari<sup>53</sup>, Per Eriksson<sup>20,21</sup>, Krista Fischer<sup>18</sup>, Pierre Fontanillas<sup>41</sup>, Anders Franco-Cereceda<sup>54</sup>, Bruna Gigante<sup>55</sup>, Leif Groop<sup>56</sup>, Stefan Gustafsson<sup>7</sup>, Jörg Hager<sup>57</sup>, Göran Hallmans<sup>58</sup>, Bok-Ghee Han<sup>14</sup>, Sarah E Hunt<sup>1</sup>, Hyun M Kang<sup>59</sup>, Thomas Illig<sup>60</sup>, Thorsten Kessler<sup>48</sup>, Joshua W Knowles<sup>5</sup>, Genovefa Kolovou<sup>61</sup>, Johanna Kuusisto<sup>62</sup>, Claudia Langenberg<sup>63</sup>, Cordelia Langford<sup>1</sup>, Karin Leander<sup>55</sup>, Marja-Liisa Lokki<sup>64</sup>, Anders Lundmark<sup>28</sup>, Mark I McCarthy<sup>3</sup>, 65,66, Christa Meisinger<sup>67</sup>, Olle Melander<sup>56</sup>, Evelin Mihailov<sup>19</sup>, Seraya Maouche<sup>68</sup>, Andrew D Morris<sup>38</sup>, Martina MüllerNurasid<sup>69–72</sup>, MuTHER Consortium<sup>52</sup>, Kjell Nikus<sup>73</sup>, John F Peden<sup>3</sup>, N William Rayner<sup>3</sup>, Asif Rasheed<sup>9</sup>, Silke Rosinger<sup>74</sup>, Diana Rubin<sup>53</sup>, Moritz P Rumpf<sup>48</sup>, Arne Schäfer<sup>75</sup>, Mohan Sivananthan<sup>76,77</sup>, Ci Song<sup>7</sup>, Alexandre F R Stewart<sup>78,79</sup>, Sian-Tsung Tan<sup>80</sup>, Gudmundur Thorgeirsson<sup>81,82</sup>, C Ellen van der Schoot<sup>83</sup>, Peter J Wagner<sup>36,37</sup>, Wellcome Trust Case Control Consortium<sup>52</sup>, George A Wells<sup>78,79</sup>, Philipp S Wild<sup>84,85</sup>, Tsun-Po Yang<sup>1</sup>, Philippe Amouyel<sup>86</sup>, Dominique Arveiler<sup>87</sup>, Hanneke Basart<sup>88</sup>, Michael Boehnke<sup>59</sup>, Eric Boerwinkle<sup>89</sup>, Paolo Brambilla<sup>90</sup>, Francois Cambien<sup>68</sup>, Adrienne L Cupples<sup>91,92</sup>, Ulf de Faire<sup>55</sup>, Abbas Dehghan<sup>93</sup>, Patrick Diemert<sup>94</sup>, Stephen E Epstein<sup>95</sup>, Alun Evans<sup>96</sup>, Marco M Ferrario<sup>97</sup>, Jean Ferrières<sup>98</sup>, Dominique Gauguier<sup>3,99</sup>, Alan S Go<sup>100</sup>, Alison H Goodall<sup>31,47</sup>, Villi Gudnason<sup>81,101</sup>, Stanley L Hazen<sup>102</sup>, Hilma Holm<sup>35</sup>, Carlos Iribarren<sup>100</sup>, Yangsoo Jang<sup>103</sup>, Mika Kähönen<sup>104</sup>, Frank Kee<sup>105</sup>, Hyo-Soo Kim<sup>106</sup>, Norman Klopp<sup>60</sup>, Wolfgang Koenig<sup>107</sup>, Wolfgang Kratzer<sup>108</sup>, Kari Kuulasmaa<sup>23</sup>, Markku Laakso<sup>62</sup>, Reijo Laaksonen<sup>108</sup>, Ji-Young Lee<sup>14</sup>, Lars Lind<sup>28</sup>, Willem H Ouwehand<sup>1,109,110</sup>, Sarah Parish<sup>24,25</sup>, Jeong E Park<sup>111</sup>, Nancy L Pedersen<sup>7</sup>, Annette Peters<sup>67,112</sup>, Thomas Quertermous<sup>5</sup>, Daniel J Rader<sup>113</sup>, Veikko Salomaa<sup>23</sup>, Eric Schadt<sup>114</sup>, Svati H Shah<sup>115,116</sup>, Juha Sinisalo<sup>117</sup>, Klaus Stark<sup>118</sup>, Kari Stefansson<sup>35,81</sup>, David- Alexandre Tréguët<sup>68</sup>, Jarmo Virtamo<sup>23</sup>, Lars Wallentin<sup>12</sup>, Nicholas Wareham<sup>63</sup>, Martina E Zimmermann<sup>118</sup>, Markku S Nieminen<sup>117</sup>, Christian Hengstenberg<sup>118</sup>, Manjinder S Sandhu<sup>1,63</sup>, Tomi Pastinen<sup>119</sup>, Ann-Christine Syvänen<sup>28</sup>, G Kees Hovingh<sup>88</sup>, George Dedoussis<sup>51</sup>, Paul W Franks<sup>32–34,120</sup>, Terho Lehtimäki<sup>29,30</sup>, Andres Metspalu<sup>18,19</sup>, Pierre A Zalloua<sup>121</sup>, Agneta Siegbahn<sup>12</sup>, Stefan Schreiber<sup>94</sup>, Samuli Ripatti<sup>1,37</sup>, Stefan S Blankenberg<sup>74</sup>, Markus Perola<sup>23</sup>, Robert Clarke<sup>24,25</sup>, Bernhard O Boehm<sup>74</sup>, Christopher O'Donnell<sup>93</sup>, Muredach P Reilly<sup>122,126</sup>, Winfried März<sup>26,123</sup>, Rory Collins<sup>24,25,127</sup>, Sekar Kathiresan<sup>41,124,125,126</sup>, Anders Hamsten<sup>20,21,126</sup>, Jaspal S Kooner<sup>80,126</sup>, Unnur Thorsteinsdottir<sup>35,81,126</sup>, John Danesh<sup>9, 126</sup>, Colin N A Palmer<sup>38,126</sup>, Robert Roberts<sup>78,79,126</sup>, Hugh Watkins<sup>3,4,126</sup>, Heribert Schunkert<sup>2,126</sup> & Nilesh J Samani<sup>31,47,126</sup>

<sup>1</sup>Wellcome Trust Sanger Institute, Hinxton, Cambridge, UK. <sup>2</sup>Institut für Integrative und Experimentelle Genomik, Universität zu Lübeck, Lübeck, Germany. <sup>3</sup>Wellcome Trust Centre for Human Genetics, University of Oxford, Oxford, UK. <sup>4</sup>Cardiovascular Medicine, Radcliffe Department of Medicine, University of Oxford, Oxford, UK. <sup>5</sup>Department of Medicine, Stanford University School of Medicine, Stanford, California, USA. <sup>6</sup>Department of Health Sciences, University of Leicester, Leicester, UK. <sup>7</sup>Department of Medical Epidemiology and Biostatistics, Karolinska Institutet, Stockholm, Sweden. <sup>8</sup>Center for Non-Communicable Diseases, Karachi, Pakistan. <sup>9</sup>Department of

Public Health and Primary Care, University of Cambridge, Cambridge, UK. <sup>10</sup>Department of Medicine, University of Pennsylvania, Philadelphia, Pennsylvania, USA. <sup>11</sup>Institut für Medizinische Biometrie und Statistik, Universität zu Lübeck, Lübeck, Germany. <sup>12</sup>Uppsala Clinical Research Center, Uppsala University, Uppsala, Sweden. <sup>13</sup>Division of Cardiovascular and Neuronal Remodelling, Multidisciplinary Cardiovascular Research Centre, Leeds Institute of Genetics, Health and Therapeutics, University of Leeds, Leeds, UK. <sup>14</sup>Center for Genome Science, Korea National Institute of Health, Korea Center for Disease Control and Prevention, Yeonje-ri, Chungwon-gun, Chungcheongbuk-do, Korea. <sup>15</sup>Division of Cardiovascular Medicine, Department of Internal Medicine, University of Michigan, Ann Arbor, Michigan, USA. <sup>16</sup>Department of Human Genetics, University of Michigan, Ann Arbor, Michigan, USA. <sup>17</sup>Department of Epidemiology and Biostatistics, Imperial College London, London, UK. <sup>18</sup>Estonian Genome Center, University of Tartu, Tartu, Estonia. <sup>19</sup>Institute of Molecular and Cell Biology, University of Tartu, Tartu, Estonia. <sup>20</sup>Atherosclerosis Research Unit, Department of Medicine, Karolinska Institutet, Stockholm, Sweden. <sup>21</sup>Center for Molecular Medicine, Karolinska University Hospital, Stockholm, Sweden. <sup>22</sup>Department of Twin Research and Genetic Epidemiology, King's College London, London, UK. <sup>23</sup>Department of Chronic Disease Prevention, National Institute for Health and Welfare, Helsinki, Finland. <sup>24</sup>Clinical Trial Service Unit, University of Oxford, Oxford, UK. <sup>25</sup>Epidemiological Studies Unit, University of Oxford, Oxford, UK. <sup>26</sup>Mannheim Institute of Public Health, Social and Preventive Medicine, Medical Faculty of Mannheim, University of Heidelberg, Mannheim, Germany. <sup>27</sup>Ludwigshafen Risk and Cardiovascular Health (LURIC) Study, Freiburg, Germany. <sup>28</sup>Department of Medical Sciences, Uppsala University, Uppsala, Sweden. <sup>29</sup>Department of Clinical Chemistry, Fimlab Laboratories, Tampere University Hospital, Tampere, Finland. <sup>30</sup>Department of Clinical Chemistry, University of Tampere School of Medicine, Tampere, Finland. <sup>31</sup>Department of Cardiovascular Sciences, University of Leicester, Glenfield Hospital, Leicester, UK. <sup>32</sup>Genetic & Molecular Epidemiology Unit, Department of Clinical Sciences, Lund University Diabetes Center, Skåne University Hospital, Malmö, Sweden. <sup>33</sup>Department of Public Health & Clinical Medicine, Genetic Epidemiology & Clinical Research Group, Section for Medicine, Umeå University, Umeå, Sweden. <sup>34</sup>Department of Odontology, Umeå University, Umeå, Sweden. <sup>35</sup>deCODE Genetics, Reykjavik, Iceland. <sup>36</sup>Institute for Molecular Medicine FIMM, University of Helsinki, Helsinki, Finland. <sup>37</sup>Public Health Genomics Unit, National Institute for Health and Welfare, Helsinki, Finland. <sup>38</sup>Medical Research Institute, University of Dundee, Ninewells Hospital and Medical School, Dundee, UK. <sup>39</sup>Department of Pharmacology, University of Pennsylvania, Philadelphia, Pennsylvania, USA. <sup>40</sup>HudsonAlpha Institute for Biotechnology, Huntsville, Alabama, USA. <sup>41</sup>Broad Institute of Harvard and MIT, Cambridge, Massachusetts, USA. <sup>42</sup>Department of Molecular Biology, Massachusetts General Hospital, Boston, Massachusetts, USA. <sup>43</sup>Center for Human Genetic Research, Massachusetts General Hospital, Boston, Massachusetts, USA. <sup>44</sup>Department of Genetics, Harvard Medical School, Boston, Massachusetts, USA. <sup>45</sup>Division of Cardiovascular and Diabetes Research, Multidisciplinary Cardiovascular Research Centre, Leeds Institute of Genetics, Health and Therapeutics, University of Leeds, Leeds, UK. <sup>46</sup>University of Cambridge Metabolic Research Laboratories, Institute of Metabolic Science, Addenbrooke's Hospital, Cambridge, UK. <sup>47</sup>National Institute for Health Research (NIHR) Leicester Cardiovascular Biomedical Research Unit, Glenfield Hospital, Leicester, UK. <sup>48</sup>Deutsches Herzzentrum München, Technische Universität München, Munich, Germany. <sup>49</sup>Practice of Gynecology, Ulm University Medical Centre, Ulm, Germany. <sup>50</sup>Biotherapeutics and Bioinnovation Center, Pfizer, South San Francisco, California, USA. <sup>51</sup>Department of Dietetics– Nutrition, Harokopio University, Athens, Greece. <sup>52</sup><sup>53</sup>Klinik für Innere Medizin, Kreiskrankenhaus Rendsburg, Rendsburg, Germany. <sup>54</sup>Cardiothoracic Surgery Unit, Department of Molecular Medicine and Surgery, Karolinska Institutet, Stockholm, Sweden. <sup>55</sup>Division of Cardiovascular Epidemiology, Institute of Environmental Medicine, Karolinska Institutet, Stockholm, Sweden. <sup>56</sup>Department of Clinical Sciences, Diabetes and Endocrinology, Lund University, University Hospital Malmö, Malmö, Sweden. <sup>57</sup>CEA–Genomics Institute, National Genotyping Centre, Paris, France. Commissariat à l'énergie atomique et aux énergies alternatives]

<sup>58</sup>Department of Public Health & Clinical Medicine, Section for Nutritional Research, Umeå University, Umeå, Sweden. <sup>59</sup>Department of Biostatistics, Center for Statistical Genetics, University of Michigan, Ann Arbor, Michigan, USA. <sup>60</sup>Hannover Unified Biobank, Hannover Medical School, Hannover, Germany. <sup>61</sup>First Cardiology Department, Onassis Cardiac Surgery Center 356, Athens, Greece. <sup>62</sup>Department of Medicine, University of Eastern Finland and Kuopio University Hospital, Kuopio, Finland. <sup>63</sup>Medical Research Council (MRC) Epidemiology Unit, Institute of Metabolic Science, Addenbrooke's Hospital, Cambridge, UK. <sup>64</sup>Transplantation Laboratory, Haartman Institute, University of Helsinki, Helsinki, Finland. <sup>65</sup>Oxford Centre for Diabetes, Endocrinology and Metabolism, University of Oxford, Oxford, UK. <sup>66</sup>Oxford NIHR Biomedical Research Centre, Churchill Hospital, Oxford, UK. <sup>67</sup>Institute of Epidemiology II, Helmholtz Zentrum München–German Research Center for Environmental Health, Neuherberg, Germany. <sup>68</sup>Institut National de la Santé et la Recherche Médicale (INSERM) Unité Mixte de Recherche (UMR) S937, Institute for Cardiometabolism and Nutrition (ICAN), Pierre and Marie Curie (Paris 6) University, Paris, France. <sup>69</sup>Department of Medicine I, University Hospital Grosshadern, Ludwig-Maximilians-Universität, Munich, Germany. <sup>70</sup>Chair of Epidemiology, Institute of Medical Informatics, Biometry and Epidemiology, Ludwig-Maximilians-Universität, Munich, Germany. <sup>71</sup>Chair of Genetic Epidemiology, Institute of Medical Informatics, Biometry and Epidemiology, Ludwig-Maximilians-Universität, Munich, Germany. <sup>72</sup>Institute of Genetic Epidemiology, Helmholtz Zentrum München–German Research Center for Environmental Health, Neuherberg, Germany. <sup>73</sup>Heart Centre, Department of Cardiology, Tampere University Hospital, Tampere, Finland. <sup>74</sup>Division of Endocrinology and Diabetes, Department of Internal Medicine, Ulm University Medical Centre, Ulm, Germany. <sup>75</sup>Institut für Klinische Molekularbiologie, Christian-Albrechts Universität, Kiel, Germany. <sup>76</sup>Division of Epidemiology, Multidisciplinary Cardiovascular Research Centre (MCRC) University of Leeds, Leeds, UK. <sup>77</sup>Leeds Institute of Genetics, Health and Therapeutics, University of Leeds, Leeds, UK. <sup>78</sup>University of Ottawa Heart Institute, Cardiovascular Research Methods Centre Ontario, Ottawa, Ontario, Canada. <sup>79</sup>Ruddy Canadian Cardiovascular Genetics Centre, Ottawa, Ontario, Canada. <sup>80</sup>National Heart and Lung Institute (NHLI), Imperial College London, Hammersmith Hospital, London, UK. <sup>81</sup>Faculty of Medicine, University of Iceland, Reykjavik, Iceland. <sup>82</sup>Department of Medicine, Landspítali University Hospital, Reykjavik, Iceland. <sup>83</sup>Department of Experimental Immunohematology, Sanquin, Amsterdam, The Netherlands. <sup>84</sup>Center for Thrombosis and Hemostasis, University Medical Center Mainz, Johannes Gutenberg University Mainz, Mainz, Germany. <sup>85</sup>Department of Medicine 2, University Medical Center Mainz, Johannes Gutenberg University Mainz, Mainz, Germany. <sup>86</sup>Institut Pasteur de Lille, INSERM U744, Université Lille Nord de France, Lille, France. <sup>87</sup>Department of Epidemiology and Public Health, EA3430, University of Strasbourg, Strasbourg, France. <sup>88</sup>Department of Vascular Medicine, Academic Medical Center, Amsterdam, The Netherlands. <sup>89</sup>Human Genetics Center, University of Texas Health Science Center, Houston, Texas, USA. <sup>90</sup>Department of Experimental Medicine, University of Milano–Bicocca, Monza, Italy. <sup>91</sup>Department of Biostatistics, Boston University School of Public Health, Boston, Massachusetts, USA. <sup>92</sup>National Heart, Lung, and Blood Institute's Framingham Heart Study, Framingham, Massachusetts, USA. <sup>93</sup>Department of Epidemiology, Erasmus Medical Center, Rotterdam, The Netherlands. <sup>94</sup>Clinic for General and Interventional Cardiology, University Heart Center Hamburg, Hamburg, Germany. <sup>95</sup>Cardiovascular Research Institute, Washington Hospital Center, Washington, DC, USA. <sup>96</sup>Centre for Public Health, The Queen's University of Belfast, Belfast, UK. <sup>97</sup>Research Centre for Epidemiology and Preventive Medicine (EPIMED), Department of Clinical and Experimental Medicine, University of Insubria, Varese, Italy. <sup>98</sup>Department of Cardiology, Toulouse University School of Medicine, Rangueil Hospital, Toulouse, France. <sup>99</sup>INSERM UMR S872, Cordeliers Research Centre, Paris, France. <sup>100</sup>Division of Research, Kaiser Permanente Northern California, Oakland, California, USA. <sup>101</sup>Icelandic Heart Association, Kopavogur, Iceland. <sup>102</sup>Lerner Research Institute, Cleveland Clinic, Cleveland, Ohio, USA. <sup>103</sup>Cardiology Division, Department of Internal Medicine, Cardiovascular Genome Center, Yonsei University, Seoul, Korea. <sup>104</sup>Department of Clinical Physiology, Tampere University Hospital and

University of Tampere, Tampere, Finland. <sup>105</sup>UK Clinical Research Collaboration (UKCRC) Centre of Excellence for Public Health (Northern Ireland), Queen's University of Belfast, Belfast, UK. <sup>106</sup>Department of Internal Medicine, Cardiovascular Center, Seoul National University Hospital, Seoul, Korea. <sup>107</sup>Department of Internal Medicine II—Cardiology, Ulm University Medical Center, Ulm, Germany. <sup>108</sup>Science Center, Tampere University Hospital, Tampere, Finland. <sup>109</sup>Department of Haematology, University of Cambridge, Cambridge, UK. <sup>110</sup>National Health Service (NHS) Blood and Transplant, Cambridge, UK. <sup>111</sup>Division of Cardiology, Samsung Medical Center, Seoul, Korea. <sup>112</sup>Munich Heart Alliance, Munich, Germany. <sup>113</sup>Division of Translational Medicine and Human Genetics, Department of Medicine, Perelman School of Medicine at the University of Pennsylvania, Philadelphia, Pennsylvania, USA. <sup>114</sup>Institute for Genomics and Multiscale Biology, Department of Genetics and Genomic Sciences, Mount Sinai School of Medicine, New York, New York, USA. <sup>115</sup>Center for Human Genetics, Department of Medicine, Duke University Medical Center, Durham, North Carolina, USA. <sup>116</sup>Division of Cardiology, Department of Medicine, Duke University Medical Center, Durham, North Carolina, USA. <sup>117</sup>Division of Cardiology, Department of Medicine, Helsinki University Central Hospital (HUCH), Helsinki, Finland. <sup>118</sup>Klinik und Poliklinik für Innere Medizin II, Regensburg, Germany. <sup>119</sup>Department of Human Genetics, McGill University, Montréal, Québec, Canada. <sup>120</sup>Department of Nutrition, Harvard School of Public Health, Boston, Massachusetts, USA. <sup>121</sup>Lebanese American University, Chouran, Beirut, Lebanon. <sup>122</sup>Cardiovascular Institute, Perelman School of Medicine at the University of Pennsylvania, Philadelphia, Pennsylvania, USA. <sup>123</sup>Synlab Academy, Mannheim, Germany. <sup>124</sup>Cardiology Division, Center for Human Genetic Research, Massachusetts General Hospital and Harvard Medical School, Boston, Massachusetts, USA. <sup>125</sup>Cardiovascular Research Center, Massachusetts General Hospital and Harvard Medical School, Boston, Massachusetts, USA. <sup>126</sup>These authors contributed equally to this work.
